# Supplementary material for: A new series of tetrahedral Co(ii) complexes [CoLX2] (X = NCS, Cl, Br, I) manifesting single-ion magnet features
Source: Royal Society of Chemistry journal article supplement (doi:10.1039/c7dt04007e), 2018-01-01
Supplement: c7dt04007e1.pdf [file c7dt04007e1.pdf]

*Supporting Information File*

**A new series of tetrahedral Co(II) complexes [CoLX<sub>2</sub>] (X = NCS, Cl, Br, I) manifesting single-ion magnet features**

**Amit Kumar Mondal,<sup>a</sup> Mahesh Sundararajan\*<sup>b</sup> and Sanjit Konar\*<sup>a</sup>**

<sup>a</sup> Department of Chemistry, IISER Bhopal, Bhopal Bypass Road, Bhauri, Bhopal-462066, M. P., India.

<sup>b</sup> Theoretical Chemistry Section, Bhabha Atomic Research Centre, Mumbai 400085, India.

**Table S1.** X-ray Crystallographic Data and Refinement Parameters for complexes **1-4**.

|                                          | <b>1</b>                                                                        | <b>2</b>                                                          | <b>3</b>                                                          | <b>4</b>                                                                                       |
|------------------------------------------|---------------------------------------------------------------------------------|-------------------------------------------------------------------|-------------------------------------------------------------------|------------------------------------------------------------------------------------------------|
| Formula                                  | C <sub>41</sub> H <sub>32</sub> CoN <sub>2</sub> OP <sub>2</sub> S <sub>2</sub> | C <sub>39</sub> H <sub>32</sub> Cl <sub>2</sub> CoOP <sub>2</sub> | C <sub>39</sub> H <sub>32</sub> Br <sub>2</sub> CoOP <sub>2</sub> | C <sub>42</sub> H <sub>40</sub> Cl <sub>2</sub> I <sub>2</sub> CoO <sub>5</sub> P <sub>2</sub> |
| M <sub>w</sub> (g mol <sup>-1</sup> )    | 753.68                                                                          | 708.42                                                            | 797.32                                                            | 1070.31                                                                                        |
| Crystal size (mm)                        | 0.50×0.19×0.15                                                                  | 0.45×0.15×0.10                                                    | 0.48×0.20×0.18                                                    | 0.42×0.14×0.11                                                                                 |
| Crystal system                           | Triclinic                                                                       | Monoclinic                                                        | Monoclinic                                                        | Monoclinic                                                                                     |
| Space group                              | <i>P</i> -1                                                                     | <i>P</i> 2 <sub>1</sub> / <i>c</i>                                | <i>P</i> 2 <sub>1</sub> / <i>c</i>                                | <i>P</i> 2 <sub>1</sub> / <i>m</i>                                                             |
| T (K)                                    | 177(2)                                                                          | 140(2)                                                            | 140(2)                                                            | 296(2)                                                                                         |
| a (Å)                                    | 9.5642(8)                                                                       | 16.8684(9)                                                        | 16.884(2)                                                         | 9.856(2)                                                                                       |
| b (Å)                                    | 10.6421(9)                                                                      | 10.4873(7)                                                        | 10.6015(14)                                                       | 18.907(4)                                                                                      |
| c (Å)                                    | 18.4548(16)                                                                     | 40.263(2)                                                         | 40.409(5)                                                         | 12.358(3)                                                                                      |
| α (°)                                    | 90.493(4)                                                                       | 90                                                                | 90                                                                | 90                                                                                             |
| β (°)                                    | 101.033(4)                                                                      | 111.257(3)                                                        | 109.960(5)                                                        | 107.427(3)                                                                                     |
| γ (°)                                    | 99.395(4)                                                                       | 90                                                                | 90                                                                | 90                                                                                             |
| V (Å <sup>3</sup> )                      | 1817.4(3)                                                                       | 6638.1(7)                                                         | 6798.6(15)                                                        | 2197.2(8)                                                                                      |
| Z                                        | 2                                                                               | 8                                                                 | 8                                                                 | 2                                                                                              |
| ρ <sub>calcd</sub> (g cm <sup>-3</sup> ) | 1.377                                                                           | 1.418                                                             | 1.558                                                             | 1.618                                                                                          |
| μ(MoKα) (mm <sup>-1</sup> )              | 0.711                                                                           | 0.806                                                             | 2.981                                                             | 2.031                                                                                          |
| <i>F</i> (000)                           | 778                                                                             | 2920                                                              | 3208                                                              | 1058.0                                                                                         |
| T <sub>max</sub> , T <sub>min</sub>      | 0.889, 0.860                                                                    | 0.933, 0.855                                                      | 0.575, 0.484                                                      | 0.810, 0.728                                                                                   |
| h, k, l range                            | -12 ≤ <i>h</i> ≤ 12, -14 ≤ <i>k</i> ≤ 14, -24 ≤ <i>l</i> ≤ 24                   | -22 ≤ <i>h</i> ≤ 22, -13 ≤ <i>k</i> ≤ 13, -52 ≤ <i>l</i> ≤ 53     | -22 ≤ <i>h</i> ≤ 22, -14 ≤ <i>k</i> ≤ 12, -54 ≤ <i>l</i> ≤ 54     | -11 ≤ <i>h</i> ≤ 11, -22 ≤ <i>k</i> ≤ 22, -14 ≤ <i>l</i> ≤ 14                                  |
| Collected reflections                    | 8946                                                                            | 15917                                                             | 17412                                                             | 4022                                                                                           |
| Independent reflections                  | 6267                                                                            | 9475                                                              | 9110                                                              | 3311                                                                                           |
| Goodness-of-fit (GOF) on F <sup>2</sup>  | 1.073                                                                           | 0.984                                                             | 1.009                                                             | 1.034                                                                                          |
| R1, wR2 (I > 2σI)                        | 0.0479, 0.1080                                                                  | 0.0561, 0.1087                                                    | 0.0850, 0.1083                                                    | 0.0720, 0.2056                                                                                 |
| R1, wR2 (all data)                       | 0.0860, 0.1251                                                                  | 0.1254, 0.1387                                                    | 0.1947, 0.1335                                                    | 0.0858, 0.2208                                                                                 |
| CCDC Number                              | 1460756                                                                         | 1460754                                                           | 1460755                                                           | 1520987                                                                                        |

$$R1 = \frac{\sum ||F_o| - |F_c||}{\sum |F_o|} \text{ and } wR2 = \frac{|\sum w(|F_o|^2 - |F_c|^2)|}{|\sum w(F_o)^2|^{1/2}}$$

**Table S2.** Bond distances (Å) around Co<sup>II</sup> centers found in complexes **1-4**.

| <b>1</b> |          | <b>2</b> |          | <b>3</b> |          | <b>4</b> |          |
|----------|----------|----------|----------|----------|----------|----------|----------|
| Co – P2  | 2.369(2) | Co – P5  | 2.382(3) | Co – P3  | 2.373(1) | Co – P1  | 2.364(2) |
| Co – P1  | 2.375(1) | Co – P6  | 2.374(3) | Co – P4  | 2.363(2) | Co – P1' | 2.364(2) |
| Co – N2  | 1.919(1) | Co – Cl1 | 2.237(1) | Co – Br1 | 2.375(1) | Co – I1  | 2.555(1) |
| Co – N1  | 1.930(1) | Co – Cl2 | 2.200(1) | Co – Br2 | 2.345(1) | Co – I2  | 2.554(1) |

**Table S3.** Bond angles (°) around Co<sup>II</sup> centers found in complexes **1-4**.

| <b>1</b>  |           | <b>2</b>    |           | <b>3</b>    |           | <b>4</b>   |           |
|-----------|-----------|-------------|-----------|-------------|-----------|------------|-----------|
| P2–Co1–P1 | 112.82(4) | Cl1–Co1–Cl2 | 115.28(3) | Br1–Co1–Br2 | 117.52(2) | I2–Co1–I1  | 118.53(2) |
| P2–Co1–N2 | 104.80(4) | Cl1–Co1–P5  | 107.03(5) | Br1–Co1–P3  | 105.78(3) | I2–Co1–P1  | 105.79(2) |
| P2–Co1–N1 | 112.93(4) | Cl1–Co1–P6  | 103.73(5) | Br1–Co1–P4  | 102.91(2) | I2–Co1–P1' | 105.79(3) |
| P1–Co1–N2 | 112.69(4) | Cl2–Co1–P5  | 108.06(5) | Br2–Co1–P3  | 107.27(2) | I1–Co1–P1  | 107.00(3) |
| P1–Co1–N1 | 99.22(3)  | Cl2–Co1–P6  | 108.38(5) | Br2–Co1–P4  | 109.26(2) | I1–Co1–P1' | 107.00(3) |
| N2–Co1–N1 | 114.70(3) | P5–Co1–P6   | 114.55(5) | P3–Co1–P4   | 114.32(1) | P1–Co1–P1' | 112.92(2) |

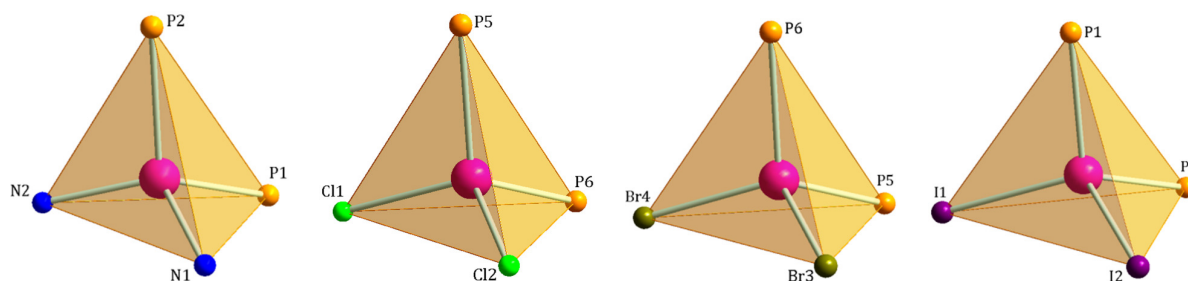**Fig. S1.** Distorted tetrahedral coordination geometry around the Co<sup>II</sup> centers in complexes **1-4**.

### Shape analysis

**Table S4:** Summary of SHAPE analysis for complexes **1-4**.

|         |   |                 |                           |
|---------|---|-----------------|---------------------------|
| SP-4    | 1 | D <sub>4h</sub> | Square                    |
| T-4     | 2 | T <sub>d</sub>  | Tetrahedron               |
| SS-4    | 3 | C <sub>2v</sub> | Seesaw                    |
| vTBPY-4 | 4 | C <sub>3v</sub> | Vacant trigonal bipyramid |

| Structure [ML <sub>4</sub> ] | SP-4   | T-4          | SS-4  | vTBPY-4 |
|------------------------------|--------|--------------|-------|---------|
| Complex <b>1</b>             | 28.596 | <b>0.281</b> | 7.907 | 3.535   |
| Complex <b>2</b>             | 28.439 | <b>0.383</b> | 7.771 | 3.393   |
| Complex <b>3</b>             | 28.359 | <b>0.519</b> | 6.622 | 3.293   |
| Complex <b>4</b>             | 30.728 | <b>1.201</b> | 7.871 | 3.345   |

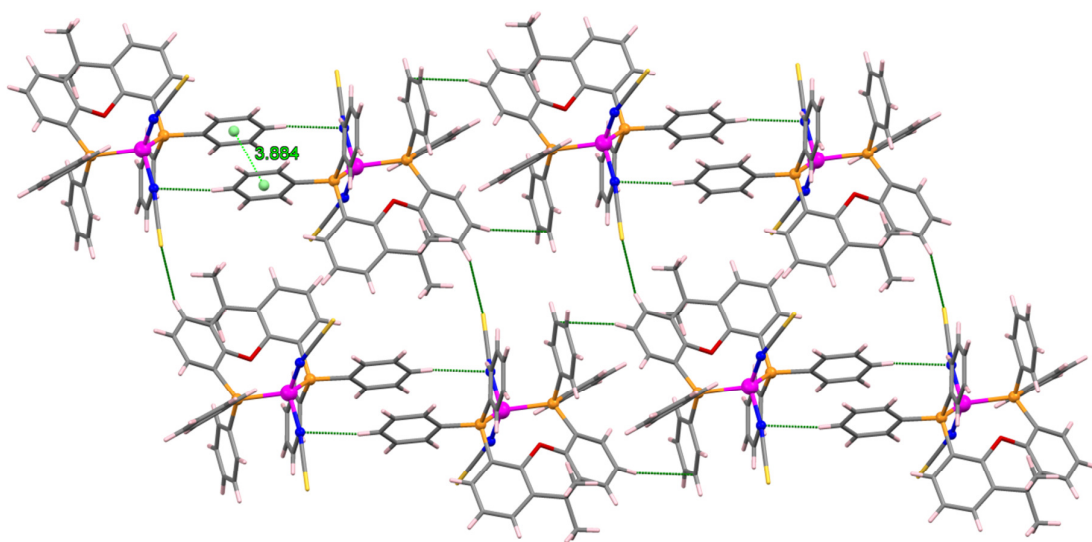

**Fig. S2.** A view of supramolecular 2D arrangement of complex **1** through intermolecular H-bonding and  $\pi\cdots\pi$  interactions.

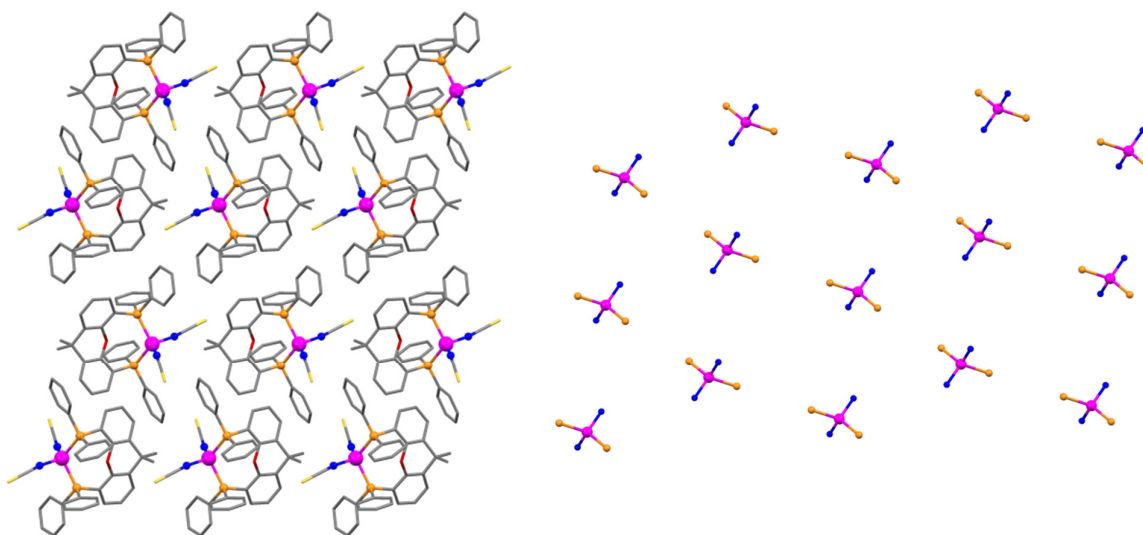

**Fig. S3.** Packing arrangement of complex **1** along the crystallographic *a*-axis (left); Packing arrangement of complex **1** along the crystallographic *b*-axis, after removing the outer sphere ligand and keeping only the tetrahedral  $\text{Co}^{\text{II}}$  cores (right).

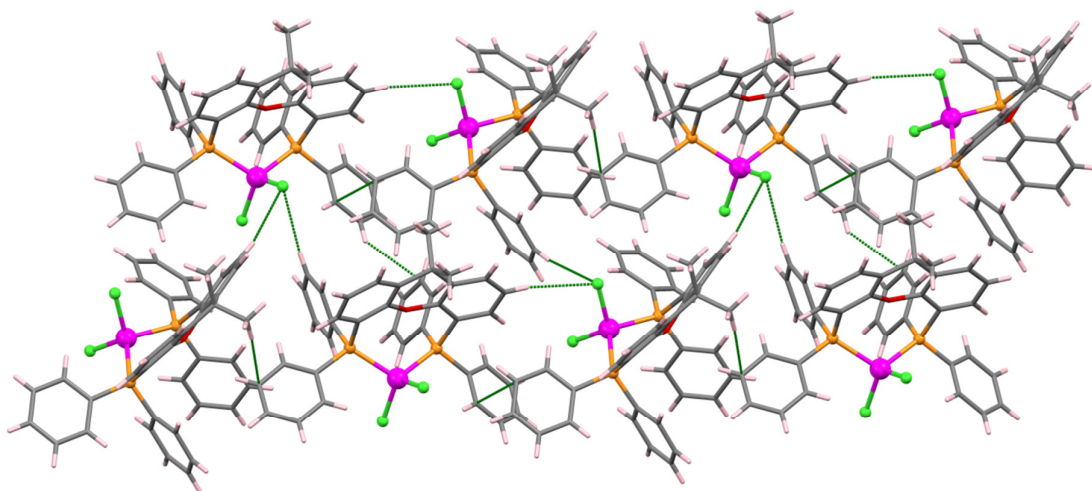

**Fig. S4.** A view of supramolecular 2D arrangement of complex **2** through intermolecular H-bonding and CH... $\pi$  interactions.

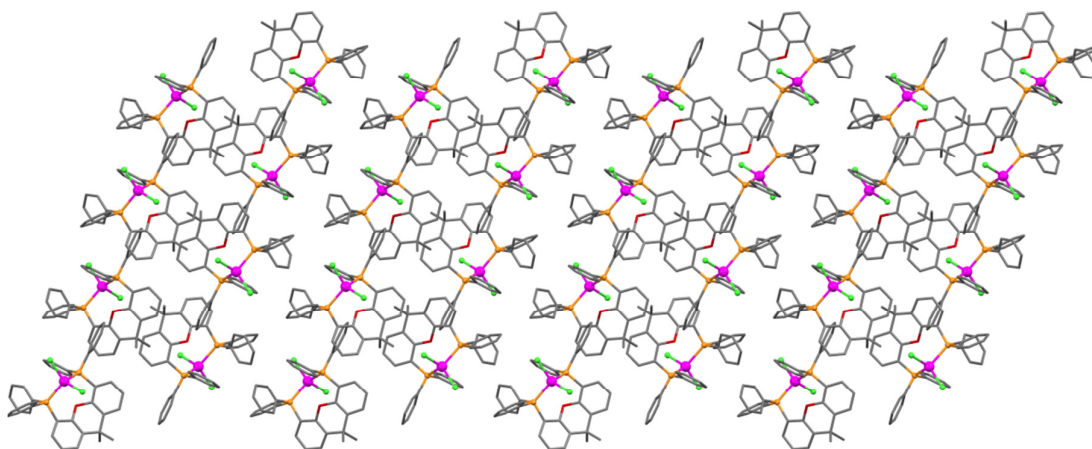

**Fig. S5.** Packing arrangement of complex **2** along the crystallographic *b*-axis.

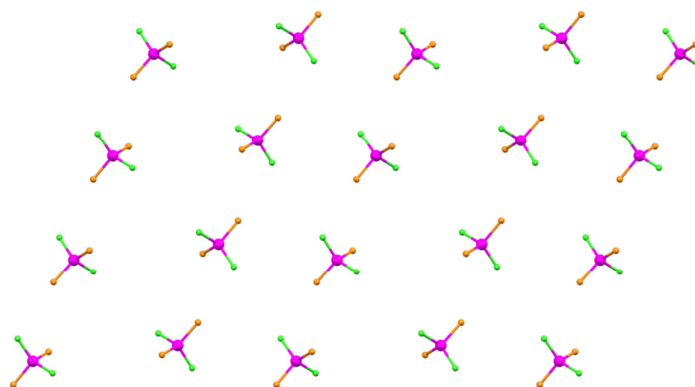

**Fig. S6.** Packing arrangement of complex **2** along the crystallographic *b*-axis, after removing the outer sphere ligand and keeping only the tetrahedral Co<sup>II</sup> cores.

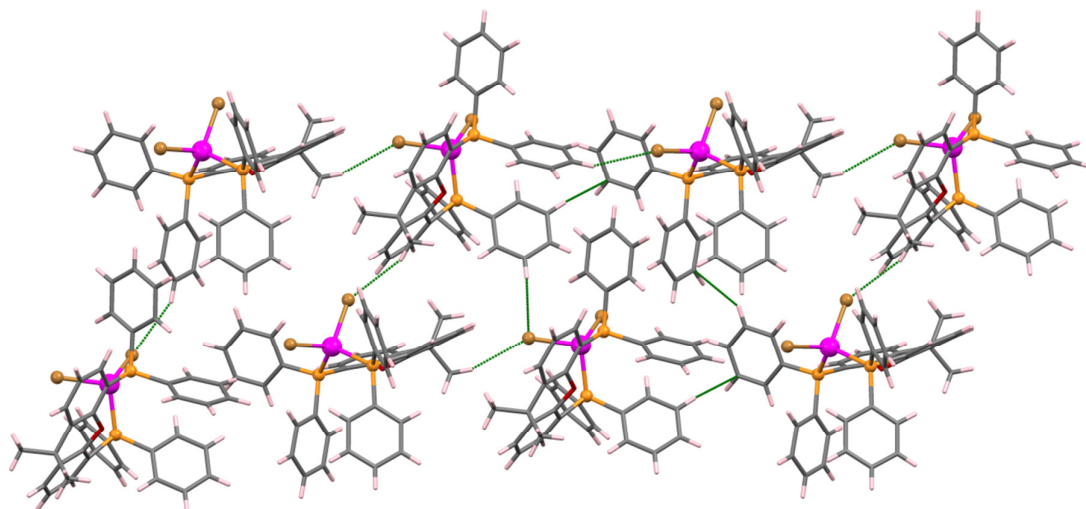

**Fig. S7.** A view of supramolecular 2D arrangement of complex **3** through intermolecular H-bonding and CH... $\pi$  interactions.

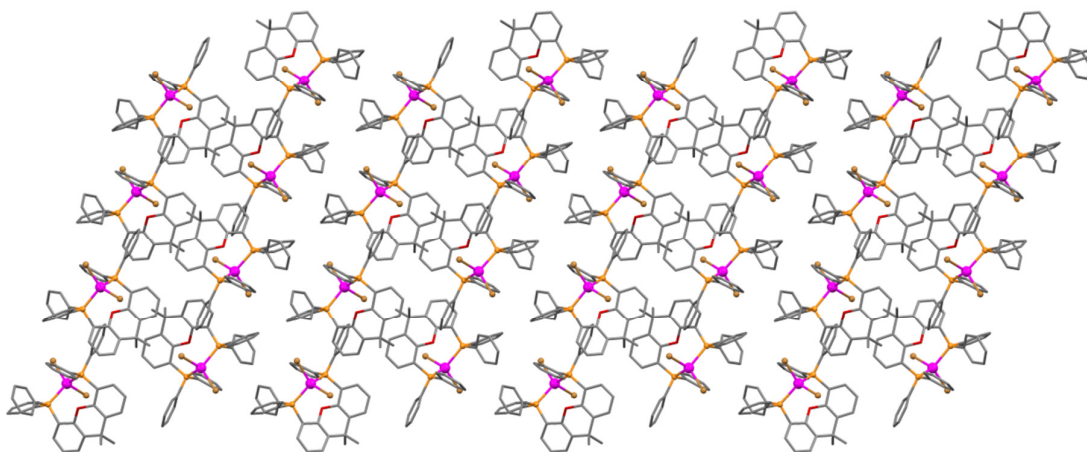

**Fig. S8.** Packing arrangement of complex **3** along the crystallographic *b*-axis.

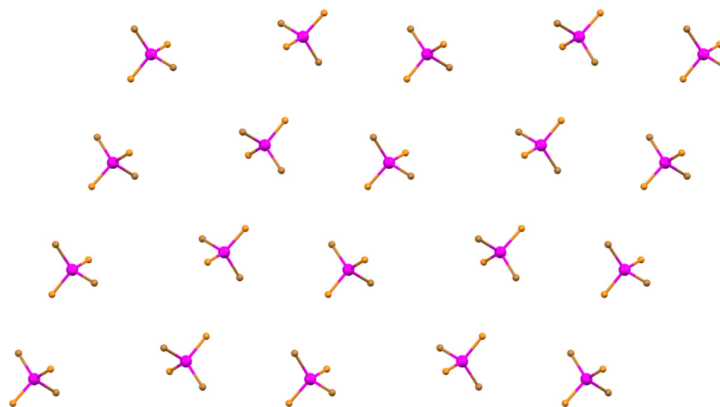

**Fig. S9.** Packing arrangement of complex **3** along the crystallographic *b*-axis, after removing the outer sphere ligand and keeping only the tetrahedral Co<sup>II</sup> cores.

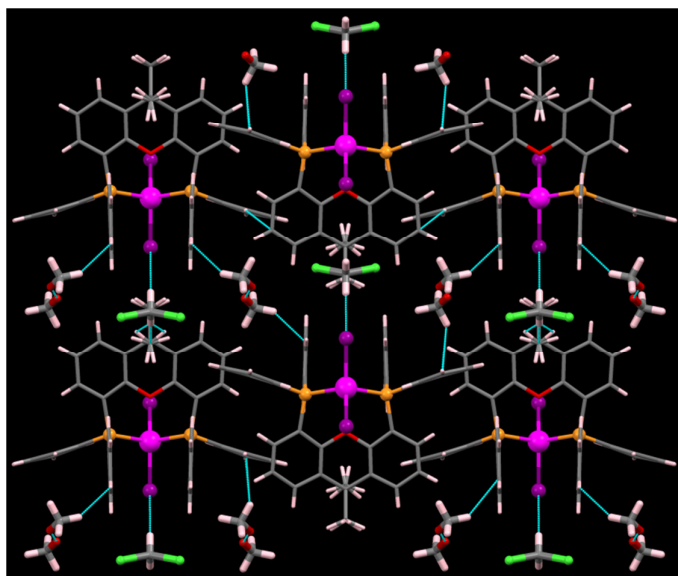

**Fig. S10.** A view of supramolecular 2D arrangement of complex **4** through intermolecular H-bonding and CH $\cdots$  $\pi$  interactions.

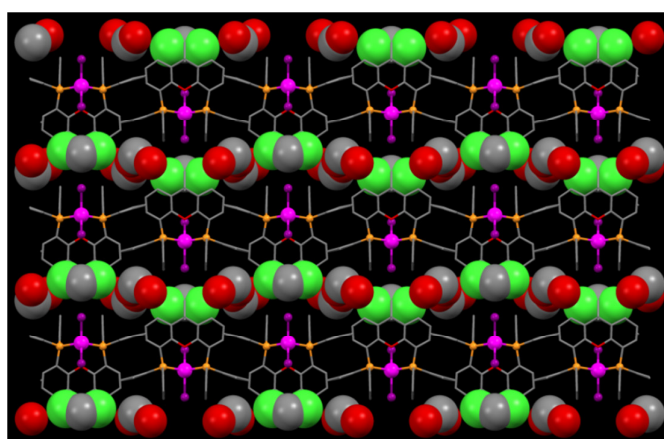

**Fig. S11.** A view of packing diagram of complex **4** illustrating the continuous 2D arrangement of lattice solvent molecules along the crystallographic *a*-axis.

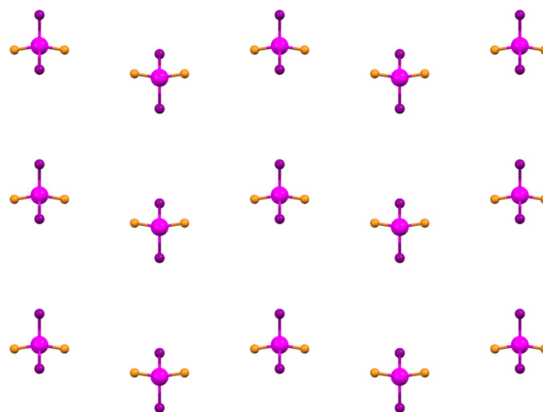

**Fig. S12.** Packing arrangement of complex **4** along the crystallographic *a*-axis, after removing the outer sphere ligand and keeping only the tetrahedral Co<sup>II</sup> cores.

**Table S5.** H-bond parameters found in complex 1.

| D—H···A       | D—H(Å) | H···A(Å) | D···A (Å) | <D-H-A(°) | Symmetry <sup>#</sup> |
|---------------|--------|----------|-----------|-----------|-----------------------|
| C21—H21···N2  | 0.950  | 2.737    | 2.581     | 156.22    | 0                     |
| C23—H23···N1  | 0.950  | 2.914    | 3.410     | 113.84    | 0                     |
| C27—H27···O1  | 0.950  | 2.779    | 3.348     | 119.32    | 0                     |
| C35—H35···N2  | 0.950  | 2.869    | 3.692     | 145.58    | 0                     |
| C33—H33···N1  | 0.950  | 2.901    | 3.746     | 148.79    | 0                     |
| C7—H7C···O1   | 0.980  | 2.743    | 3.268     | 114.08    | 0                     |
| C1—H1···S2    | 0.950  | 2.927    | 3.669     | 135.81    | 1                     |
| C15—H15C···S1 | 0.980  | 2.837    | 3.757     | 156.78    | 2                     |
| C37—H37···S1  | 0.950  | 2.984    | 3.865     | 154.83    | 3                     |
| C36—H36···N1  | 0.950  | 2.705    | 3.649     | 172.51    | 4                     |

# (0) x,y,z; (1) x+1,+y+1,z; (2) x,+y+1,+z; (3) -x+1,-y,-z+1; (4) -x,-y,-z+1.

**Table S6.** H-bond parameters found in complex 2.

| D—H···A         | D—H(Å) | H···A(Å) | D···A (Å) | <D-H-A(°) | Symmetry <sup>#</sup> |
|-----------------|--------|----------|-----------|-----------|-----------------------|
| C152—H152···O2  | 0.930  | 2.738    | 3.605     | 155.49    | 0                     |
| C120—H120···Cl6 | 0.930  | 2.868    | 3.710     | 151.25    | 1                     |
| C128—H128···Cl1 | 0.930  | 2.948    | 3.869     | 171.14    | 2                     |
| C134—H134···O3  | 0.930  | 2.727    | 3.596     | 155.98    | 3                     |
| C143—H14D···Cl1 | 0.960  | 2.897    | 3.746     | 148.09    | 4                     |
| C102—H102···C15 | 0.930  | 2.948    | 3.874     | 173.60    | 5                     |
| C146—H146···C15 | 0.930  | 2.858    | 3.773     | 168.31    | 5                     |
| C83—H83···Cl1   | 0.930  | 2.939    | 3.860     | 170.58    | 6                     |

# (0) x,y,z; (1) -x+1,-y,-z; (2) x,+y-1,+z; (3) x-1,+y,+z; (4) -x+1,+y-1/2,-z+1/2; (5) x,+y+1,+z; (6) x+1,+y-1,+z.

**Table S7.** H-bond parameters found in complex 3.

| D—H···A         | D—H(Å) | H···A(Å) | D···A (Å) | <D-H-A(°) | Symmetry <sup>#</sup> |
|-----------------|--------|----------|-----------|-----------|-----------------------|
| C116—H116···O1  | 0.930  | 2.747    | 3.598     | 152.61    | 0                     |
| C128—H128···O3  | 0.930  | 2.751    | 3.620     | 155.79    | 1                     |
| C136—H136···Br3 | 0.930  | 2.989    | 3.916     | 174.72    | 2                     |
| C142—H14D···Br1 | 0.960  | 2.992    | 3.862     | 151.28    | 3                     |
| C82—H82···Br1   | 0.930  | 2.917    | 3.839     | 171.47    | 4                     |
| C93—H93C···Br3  | 0.960  | 2.940    | 3.817     | 152.34    | 5                     |
| C102—H102···Br2 | 0.930  | 2.974    | 3.832     | 154.21    | 6                     |

# (0) x,y,z; (1) x-1,+y,+z; (2) x,+y-1,+z; (3) -x+1,+y+1/2,-z+1/2; (4) x+1,+y+1,+z; (5) -x+2,+y-1/2,-z+1/2; (6) -x+1,-y,-z.

**Table S8.** H-bond parameters found in complex 4.

| D—H···A        | D—H(Å) | H···A(Å) | D···A (Å) | <D-H-A(°) | Symmetry <sup>#</sup> |
|----------------|--------|----------|-----------|-----------|-----------------------|
| C14—H14···O6   | 0.930  | 2.866    | 3.440     | 121.13    | 0                     |
| C8—H8···O1A    | 0.930  | 2.929    | 3.349     | 108.98    | 0                     |
| C16—H16B···O1A | 0.960  | 2.882    | 3.358     | 111.75    | 0                     |
| C28—H28A···O5  | 0.960  | 1.645    | 2.215     | 113.82    | 0                     |
| C15—H15···O6   | 0.930  | 2.885    | 3.565     | 131.00    | 1                     |
| C11—H11···Cl1  | 0.930  | 2.956    | 3.726     | 141.10    | 2                     |
| C5—H5···Cl1    | 0.930  | 2.991    | 3.728     | 137.33    | 3                     |

# (0) x,y,z; (1) -x+1,-y+1,-z+2; (2) x,+y,+z-1; (3) -x,-y+1,-z+1.



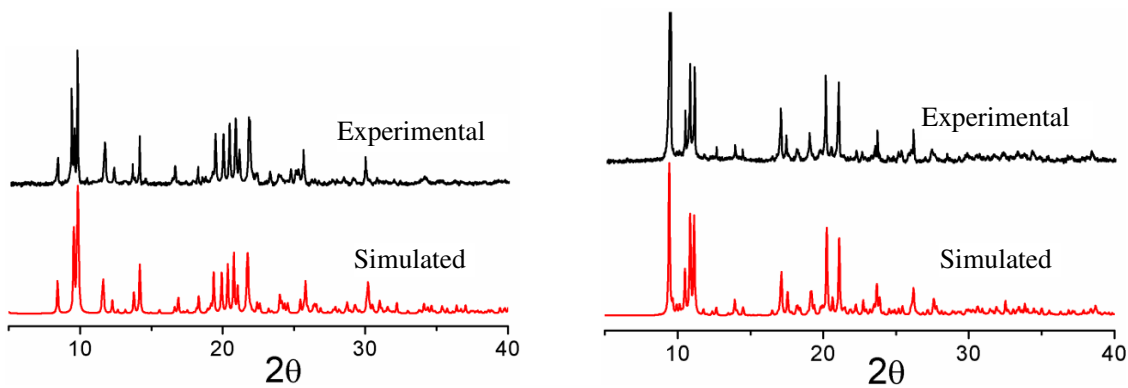

**Fig. S13.** PXRD patterns of complexes **1** (left) and **2** (right).

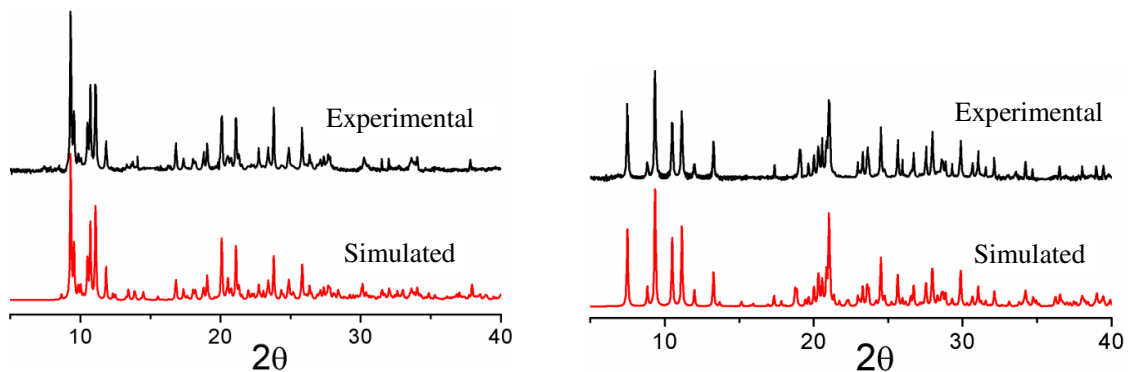

**Fig. S14.** PXRD patterns of complexes **3** (left) and **4** (right).

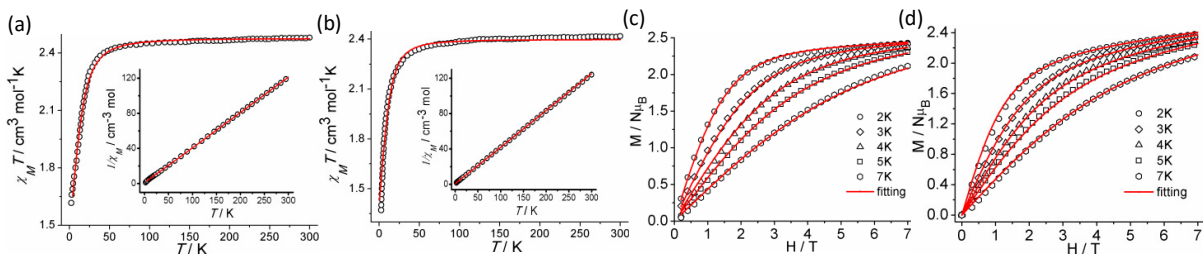

**Fig. S15.**  $\chi_M T$  vs.  $T$  plots measured at 0.1 T for complex **3** (a) and **4** (b).  $1/\chi_M$  vs.  $T$  plots shown in the inset;  $M/N\mu_B$  vs.  $H/T$  plots for complex **3** (c) and **4** (d) at the indicated temperatures. The red lines are the best fit.

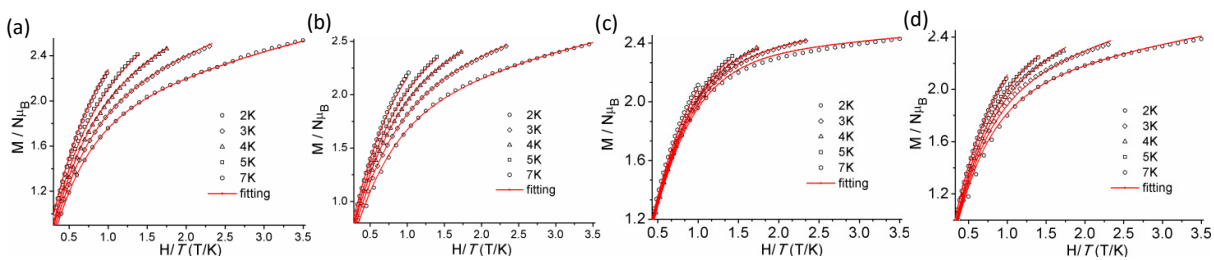

**Fig. S16.**  $M/N\mu_B$  vs.  $H/T$  plots at the indicated temperatures for complexes **1-4** (a-d). The red lines are the best fit.



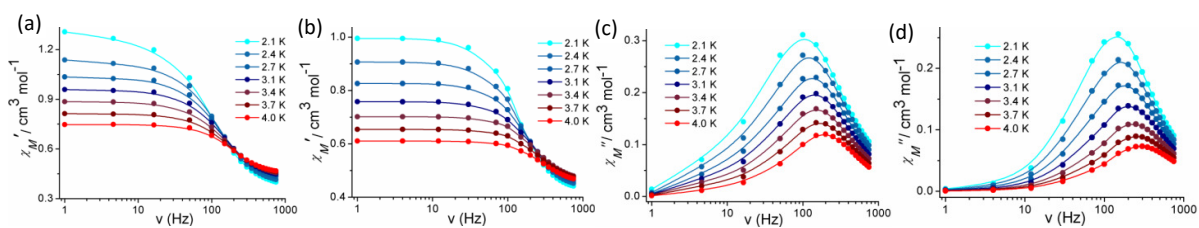

**Fig. S17.** Frequency dependency of the in-phase ( $\chi_M'$ ) (a and b) and out-of-phase ( $\chi_M''$ ) (c and d) AC magnetic susceptibility plots for complex **3** and **4** under 1000 Oe dc field.

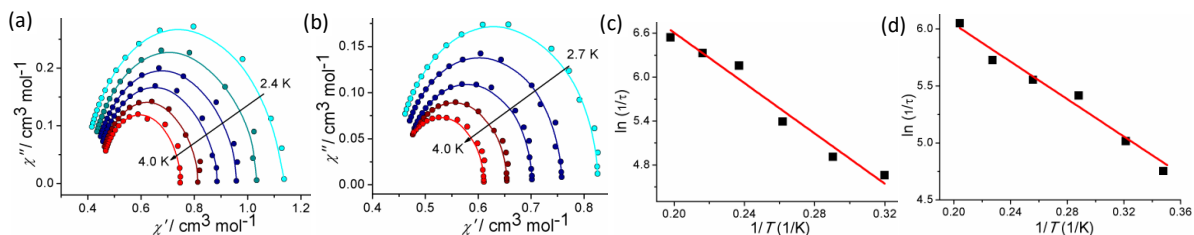

**Fig. S18.** Cole-Cole plots for complex **3** (a) and **4** (b). Solid lines represent the best fit;  $\ln(1/\tau)$  vs.  $1/T$  plots for complex **3** (c) and **4** (d). The red lines are the best fit of the Arrhenius relationship.

#### Experimental information for dilution studies:

##### Synthesis of $[\text{Zn}(\text{L})(\text{Cl})_2]$ (**5**)

Ligand (57 mg, 0.1 mmol) was dissolved in  $\text{CH}_2\text{Cl}_2$  (5 ml) and the solution was stirred at room temperature. Then,  $\text{ZnCl}_2$  (14 mg, 0.1 mmol) dissolved in MeOH (5 ml) was added dropwise to the above ligand solution. The resulting solution forms an intense blue mixture that was stirred further for 2 hrs. The solution was then filtered off and the filtrate was left at open atmosphere for slow evaporation which yields large X-ray quality yellow crystals of  $[\text{Zn}(\text{L})(\text{Cl})_2]$  (**5**) after 2 days. The crystals were separated, washed with cold water and  $\text{Et}_2\text{O}$  and air-dried yield (70 %). Anal. Calcd for  $\text{C}_{39}\text{H}_{32}\text{ZnCl}_2\text{P}_2\text{O}$ : C, 65.50; H, 4.51 %. Found: C, 65.57; H, 4.42 %.

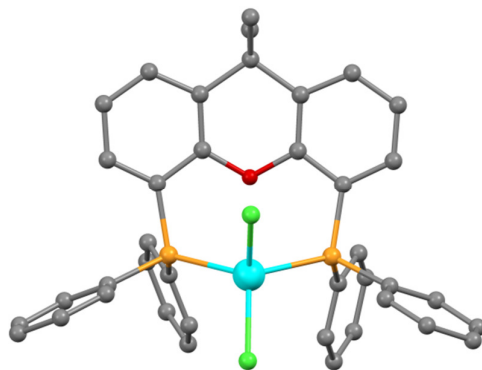

**Fig. S19.** View of the molecular structure of complex **5**; hydrogen atoms are omitted for clarity.

**Table S9.** X-ray Crystallographic Data and Refinement Parameters for complex **5**.

| <b>5</b>                                 |                                                                    |
|------------------------------------------|--------------------------------------------------------------------|
| Formula                                  | C <sub>39</sub> H <sub>32</sub> ZnCl <sub>2</sub> P <sub>2</sub> O |
| M <sub>w</sub> (g mol <sup>-1</sup> )    | 714.88                                                             |
| Crystal size (mm)                        | 0.45×0.18×0.16                                                     |
| Crystal system                           | Monoclinic                                                         |
| Space group                              | <i>P2<sub>1</sub>/c</i>                                            |
| T (K)                                    | 296(2)                                                             |
| a (Å)                                    | 16.8819(5)                                                         |
| b (Å)                                    | 10.4934(3)                                                         |
| c (Å)                                    | 40.2603(12)                                                        |
| α (°)                                    | 90                                                                 |
| β (°)                                    | 111.192(2)                                                         |
| γ (°)                                    | 90                                                                 |
| V (Å <sup>3</sup> )                      | 6649.7(3)                                                          |
| Z                                        | 8                                                                  |
| ρ <sub>calcd</sub> (g cm <sup>-3</sup> ) | 1.428                                                              |
| μ(MoKα) (mm <sup>-1</sup> )              | 1.027                                                              |
| F(000)                                   | 2944.0                                                             |
| T <sub>max</sub> , T <sub>min</sub>      | 0.838, 0.811                                                       |
| h, k, l range                            | -22 ≤ h ≤ 22, -14 ≤ k ≤ 14, -54 ≤ l ≤ 54                           |
| Collected reflections                    | 17263                                                              |
| Independent reflections                  | 11399                                                              |
| Goodness-of-fit (GOF) on F <sup>2</sup>  | 0.872                                                              |
| R1, wR2 (I > 2σI)                        | 0.0456, 0.1054                                                     |
| R1, wR2 (all data)                       | 0.0800, 0.1234                                                     |
| CCDC Number                              | 1527508                                                            |

$R1 = \frac{\sum ||F_o| - |F_c||}{\sum |F_o|}$  and  $wR2 = \frac{|\sum w(|F_o|^2 - |F_c|^2)|}{|\sum w(F_o)^2|^{1/2}}$

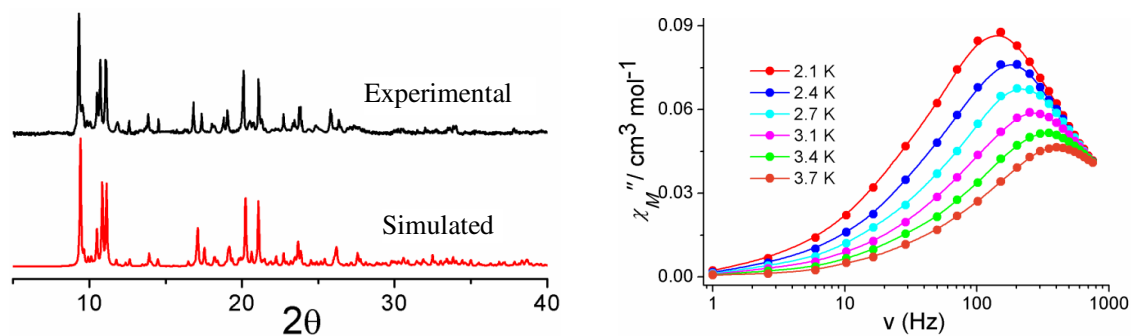**Fig. S20.** PXRD patterns of diluted sample (left); Frequency dependency of the out-of-phase ( $\chi_M''$ ) AC magnetic susceptibility plot for diluted sample at 1000 Oe dc field (right).

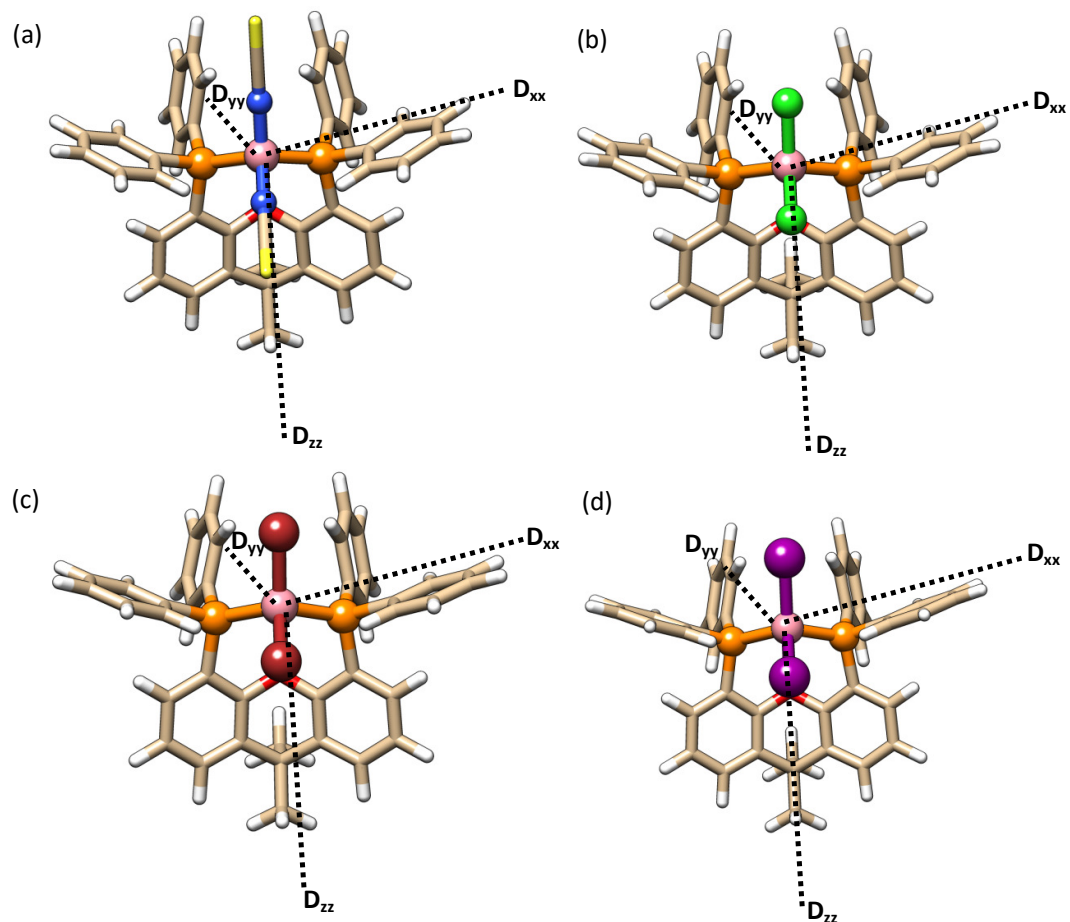

**Fig. S21.** Optimized structure of complexes **1-4** (a-d) at the DFT level along with *ab initio* computed  $D$ -tensor orientation.

**Table S10.** Optimized structural parameters of complexes **1-4**.<sup>a</sup>

|              | <b>1</b>                | <b>2</b>                | <b>3</b>                | <b>4</b>                |
|--------------|-------------------------|-------------------------|-------------------------|-------------------------|
| Co-P, Å      | 2.345, 2.345<br>(2.372) | 2.339<br>(2.378)        | 2.336, 2.337<br>(2.366) | 2.337, 2.338<br>(2.364) |
| Co-X, Å      | 1.873, 1.869<br>(1.924) | 2.215, 2.223<br>(2.221) | 2.352, 2.363<br>(2.356) | 2.542, 2.554<br>(2.554) |
| $\alpha$ , ° | 114.33<br>(112.82)      | 115.51<br>(114.22)      | 115.14<br>(114.67)      | 114.97<br>(112.92)      |
| $\beta$ , °  | 121.48<br>(114.70)      | 118.50<br>(116.34)      | 117.15<br>(116.57)      | 114.95<br>(118.53)      |

<sup>a</sup> Values in brackets are from experiments

**Table S11.** AILFT and the ligand field splitting parameters for the four complexes (in  $\text{cm}^{-1}$ ).

|           | <b>1</b>       | <b>2</b>       | <b>3</b>       | <b>4</b>       |
|-----------|----------------|----------------|----------------|----------------|
| $\Delta$  | -5864          | -4897          | -4459          | -4057          |
| $10Dq$    | 5324<br>(4967) | 4424<br>(4333) | 4149<br>(4333) | 3849<br>(4033) |
| $\mu$     | -541           | -473           | -310           | -207           |
| $B$       | 940            | 948            | 945            | 932            |
| $\beta^a$ | 0.869          | 0.876          | 0.873          | 0.861          |
| $C$       | 3880           | 3939           | 3944           | 3916           |
| $Z$       | 505.2          | 504.0          | 495.5          | 473.4          |

<sup>a</sup> $\beta=B/B_0$ ,  $B_0$  = Racah parameter of free  $\text{Co}^{2+}$  ion =  $1082 \text{ cm}^{-1}$  ( $1120 \text{ cm}^{-1}$ )

**Table S12.** Comparison of the experimental absorption maxima and calculated electronic transition energies <sup>a</sup> (in  $\text{cm}^{-1}$ ).

| level                                   | <b>1</b>        | <b>2</b>        | <b>3</b>        | <b>4</b>        |
|-----------------------------------------|-----------------|-----------------|-----------------|-----------------|
| ${}^4A_2 \rightarrow {}^4T_2(\text{F})$ | 4400 (5092.1)   | 4000 (4248.4)   | 4000 (4094.7)   | 3800 (3834.1)   |
| ${}^4A_2 \rightarrow {}^4T_2(\text{F})$ | 4800 (5455.5)   | 4300 (4450.6)   | 4300 (4220.5)   | 4000 (4298.3)   |
| ${}^4A_2 \rightarrow {}^4T_2(\text{F})$ | 5700 (7567.2)   | 4700 (6140.8)   | 4700 (5862.2)   | 4300 (5563.5)   |
| ${}^4A_2 \rightarrow {}^4T_1(\text{F})$ | 7600 (8221.6)   | 6200 (7385.0)   | 5900 (7258.7)   | 5700 (7242.0)   |
| ${}^4A_2 \rightarrow {}^4T_1(\text{F})$ | 8400 (10011.2)  | 7400 (8744.2)   | 6900 (8428.8)   | 6800 (8254.6)   |
| ${}^4A_2 \rightarrow {}^4T_1(\text{F})$ | 9350 (13232.7)  | 9050 (11941.4)  | 8800 (11526.5)  | 8650 (11172.5)  |
| ${}^4A_2 \rightarrow {}^4T_1(\text{P})$ | 16200 (17971.2) | 15700 (17934.2) | 15400 (18306.6) | 14500 (18829.9) |
| ${}^4A_2 \rightarrow {}^4T_1(\text{P})$ | 16800 (22159.3) | 16400 (21057.3) | 16100 (20611.1) | 15200 (20221.3) |
| ${}^4A_2 \rightarrow {}^4T_1(\text{P})$ | 17800 (23849.2) | 17100 (21959.0) | 16500 (21071.1) | 16000 (20281.8) |

<sup>a</sup> calculated values in brackets.
